# Supplementary material for: TREM2 shedding by cleavage at the H157‐S158 bond is accelerated for the Alzheimer's disease‐associated H157Y variant
Source: PubMed Central journal article supplement (PMC5623839; doi:10.15252/emmm.201707673), 2017-08-30
Supplement: EMMM-9-1366-s005.pdf [file EMMM-9-1366-s005.pdf]

Fig5A

DAP12

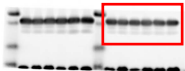

Fig5A

TREM2

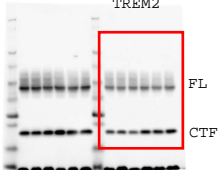

Fig5A

GAPDH

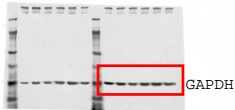

Fig5C

sAPPalpha

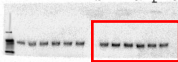

sAPPa

Fig5C

TREM2 NTF

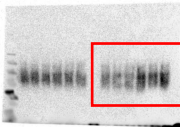

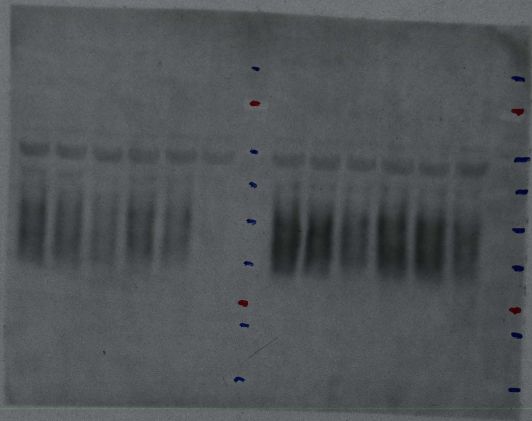

2017.01.31

$\alpha$  NTF T<sub>2</sub>

60 d

TREM2 Fig5E
