# Supplementary material for: TREM2 shedding by cleavage at the H157‐S158 bond is accelerated for the Alzheimer's disease‐associated H157Y variant
Source: PubMed Central journal article supplement (PMC5623839; doi:10.15252/emmm.201707673), 2017-08-30

Fig6A

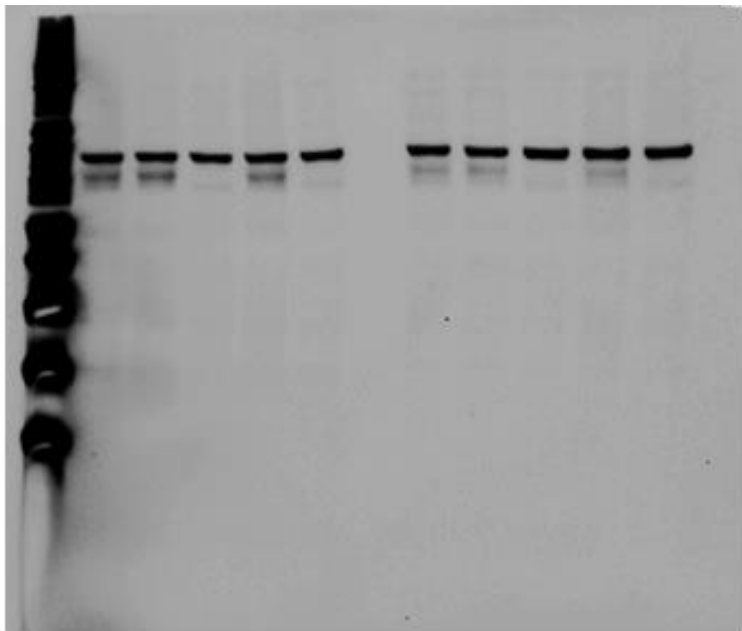

Fig6B

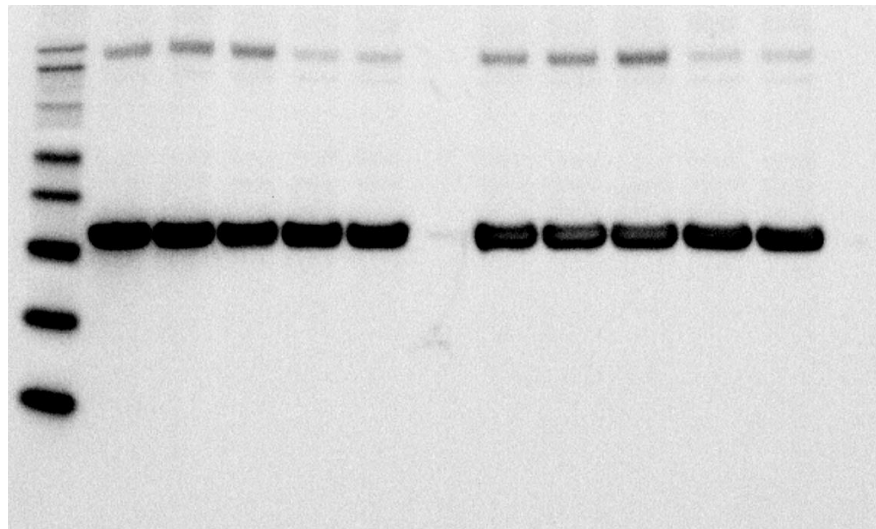

Supplement: EMMM-9-1366-s006.pdf [file EMMM-9-1366-s006.pdf]
