# Supplementary material for: TREM2 shedding by cleavage at the H157‐S158 bond is accelerated for the Alzheimer's disease‐associated H157Y variant
Source: EMBO Mol Med. 2017 Aug 30;9(10):1366–78. doi: 10.15252/emmm.201707673 (PMC5623839; doi:10.15252/emmm.201707673)
Supplement: Supplementary file 1 — Expanded View Figures PDF [file EMMM-9-1366-s001.pdf]

Expanded View Figures

|             |                   |       |       |       |  |          |       |      |
|-------------|-------------------|-------|-------|-------|--|----------|-------|------|
| Supernatant |                   |       |       |       |  |          |       |      |
|             |                   |       |       |       |  |          |       |      |
| Time (h)    | biotin TREM2 [ng] |       |       |       |  | Time (h) | % t=0 | SEM  |
| 0.0         | 0.0               | 0.0   | 0.0   | 0.0   |  | 0.0      | 0.0   | 0.0  |
| 0.5         | 188.7             | 314.4 | 881.6 | 651.2 |  | 0.5      | 112.2 | 34.8 |
| 1.0         | 267.8             | 407.4 | 767.7 | 972.8 |  | 1.0      | 133.1 | 35.7 |
| 4.5         | 182.6             | 316.3 | 502.7 | 644.0 |  | 4.5      | 90.7  | 22.4 |
|             |                   |       |       |       |  |          |       |      |
|             |                   |       |       |       |  |          |       |      |
|             |                   |       |       |       |  |          |       |      |
| Membrane    |                   |       |       |       |  |          |       |      |
|             |                   |       |       |       |  |          |       |      |
| Time (h)    | biotin TREM2 [ng] |       |       |       |  | Time (h) | % t=0 | SEM  |
| 0.0         | 346.3             | 338.2 | 545.2 | 585.3 |  | 0.0      | 100.0 | 14.3 |
| 0.5         | 115.9             | 115.5 | 244.4 | 254.5 |  | 0.5      | 40.2  | 8.5  |
| 1.0         | 127.9             | 130.1 | 134.3 | 188.2 |  | 1.0      | 32.0  | 3.2  |
| 4.5         | 131.4             | 114.5 | 95.4  | 129.5 |  | 4.5      | 25.9  | 1.8  |
|             |                   |       |       |       |  |          |       |      |
|             |                   |       |       |       |  |          |       |      |
|             |                   |       |       |       |  |          |       |      |
| Cytosol     |                   |       |       |       |  |          |       |      |
|             |                   |       |       |       |  |          |       |      |
| Time (h)    | biotin TREM2 [ng] |       |       |       |  | Time (h) | % t=0 | SEM  |
| 0.0         | 116.1             | 150.0 | 431.2 | 417.7 |  | 0.0      | 61.4  | 18.6 |
| 0.5         | 53.5              | 64.9  | 141.0 | 159.3 |  | 0.5      | 23.1  | 5.9  |
| 1.0         | 32.8              | 39.1  | 102.5 | 112.6 |  | 1.0      | 15.8  | 4.6  |
| 4.5         | 28.3              | 26.3  | 23.6  | 26.0  |  | 4.5      | 5.7   | 0.2  |
|             |                   |       |       |       |  |          |       |      |
|             |                   |       |       |       |  |          |       |      |
|             |                   |       |       |       |  |          |       |      |
| Nucleus     |                   |       |       |       |  |          |       |      |
|             |                   |       |       |       |  |          |       |      |
| Time (h)    | biotin TREM2 [ng] |       |       |       |  | Time (h) | % t=0 | SEM  |
| 0.0         | 128.1             | 122.5 | 289.3 | 323.6 |  | 0.0      | 47.6  | 11.6 |
| 0.5         | 119.1             | 114.8 | 270.3 | 287.8 |  | 0.5      | 43.6  | 10.3 |
| 1.0         | 144.8             | 99.9  | 196.5 | 250.5 |  | 1.0      | 38.1  | 7.2  |
| 4.5         | 119.1             | 84.5  | 161.0 | 174.8 |  | 4.5      | 29.7  | 4.5  |

**Figure EV1. Surface biotinylation and fate of TREM2.**

Surface-expressed TREM2 on human macrophages was biotinylated at  $t = 0$  and fractionated into four pools: supernatant, membrane-associated, cytosolic and nuclear. Similar fractionation was undertaken following incubation for 0.5, 1.0 and 4.5 h. TREM2-associated biotin was purified by immunoprecipitation and quantified by MSD for biotinylated TREM2. The raw and processed data are presented here. The left block of data shows biotin TREM2 measurements for four timepoints for four biological replicates for each of the four subcellular pools. The right block of data represents the normalised TREM2 quantification, with the membrane fraction at  $t = 0$  defined as 100%.

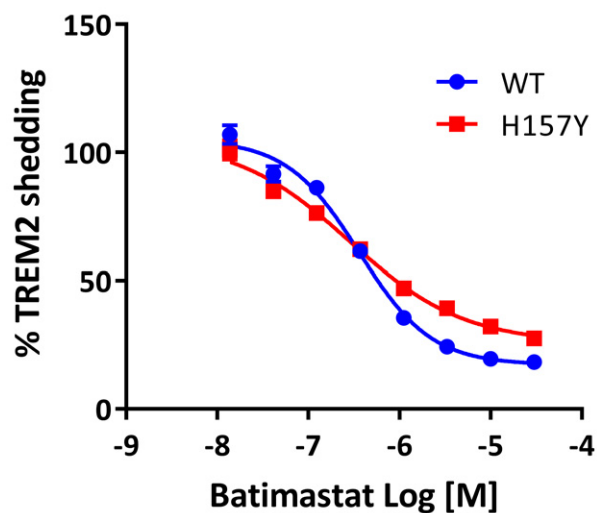

**Figure EV2. Titration of batimastat against WT and H157Y TREM2 shedding.**

The concentration of batimastat in the culture medium of HEK293 cells expressing either WT or H157Y TREM2 (with hDAP12) was varied over 4.5 orders of magnitude and shed TREM2 quantified by MSD assay 24 h later. More batimastat-resistant shedding of the variant TREM2 is apparent at higher inhibitor concentrations as compared to the WT protein. Data plotted as mean  $\pm$  SEM.

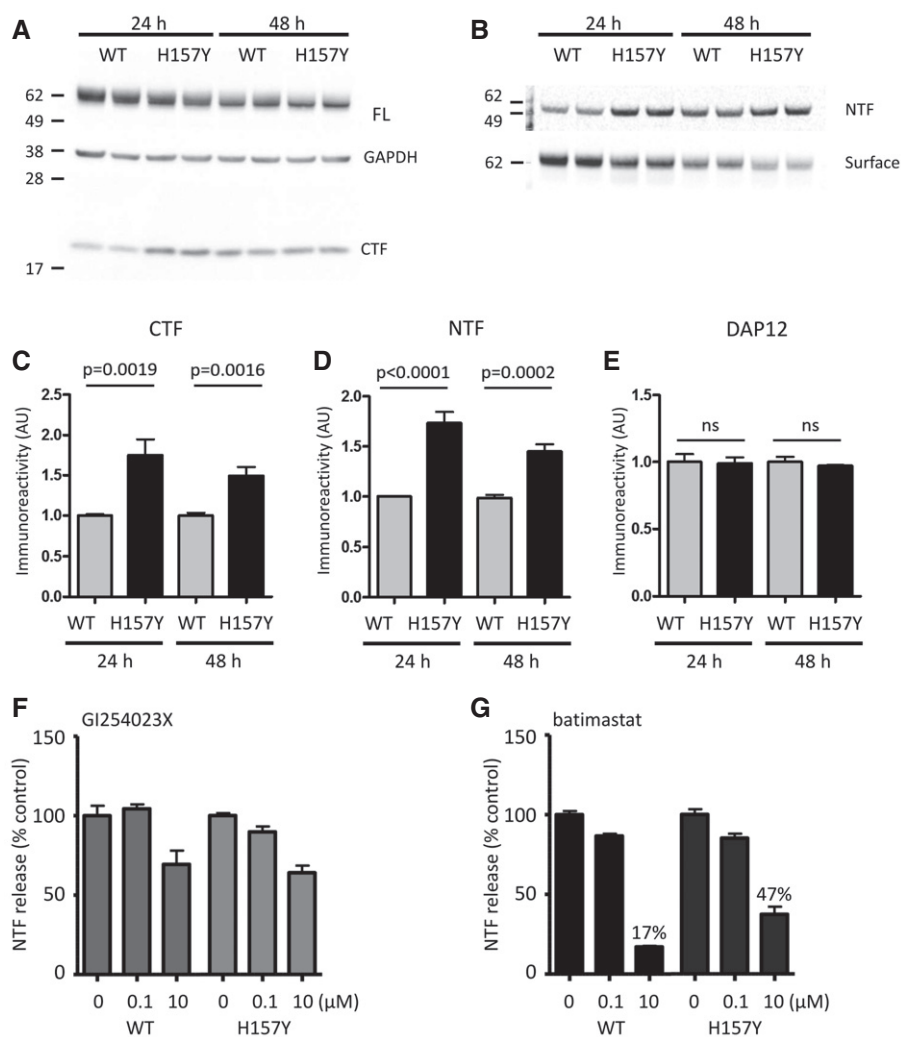

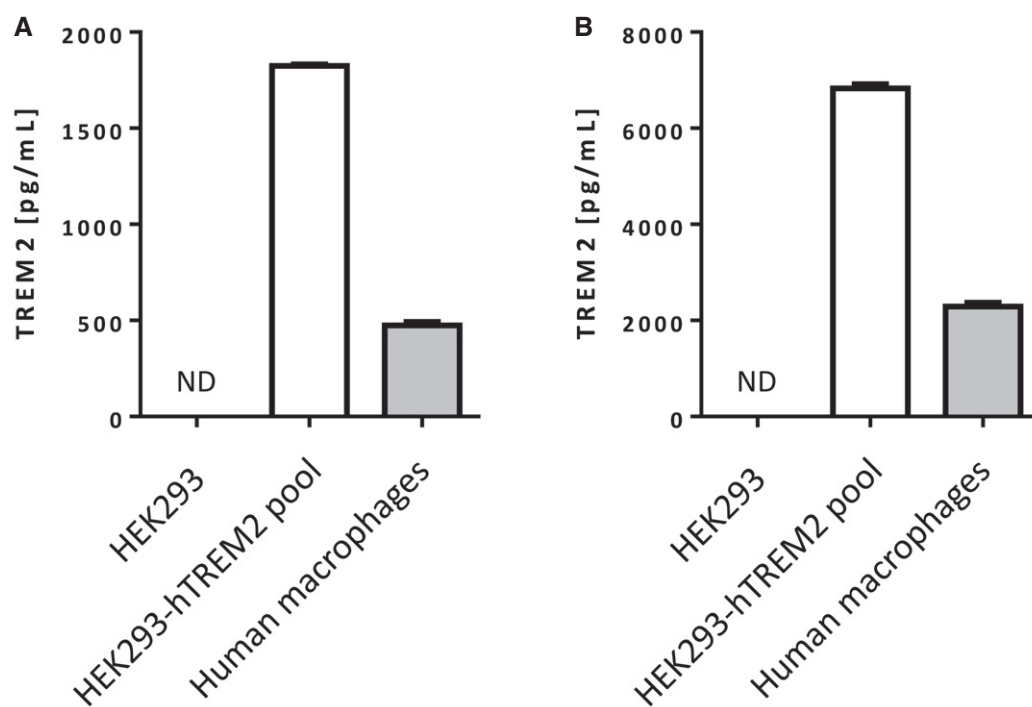

**Figure EV4. Validation data for the shed TREM2 MSD assay.**

A, B The MSD assay detected TREM2 in the conditioned media (A) and lysates (B) of HEK293 cells stably expressing hTREM2 and of primary human macrophages but not in parental HEK293 cultures. ND = not detected.
